# Supplementary material for: Synthesis, optical properties, and acid–base indicating performance of novel ketene hydroxybenzylidene nopinone derivatives
Source: Royal Society of Chemistry journal article supplement (doi:10.1039/c6ra20809f), 2016-01-01
Supplement: c6ra20809f1.pdf [file c6ra20809f1.pdf]

**Synthesis, optical properties, and acid-base indicating performance of novel ketene  
hydroxybenzylidene nopinone derivatives**

Jinlai Yang,<sup>abc</sup> Xu Xu,<sup>ad</sup> Yiqin Yang,<sup>e</sup> Jian Rui,<sup>a</sup> Yan Zhang,<sup>a</sup> Hongbo Kuang,<sup>a</sup> Shifa  
Wang,<sup>\*ad</sup> Liangru Wu<sup>\*bc</sup>

**Supplementary data**

\*Corresponding author: Dr. and Prof. Shifa Wang

College of Chemical Engineering, Nanjing Forestry University, Nanjing, Jiangsu  
210037, China

Jiangsu Key Lab of Biomass-based green Fuels and Chemicals, Nanjing, Jiangsu  
210037, China

Phone: +86-25-85427812; Fax: +86-25-85427812

Email: wangshifa65@163.com

**Table S1.** Crystal data, diffraction data, and refinement data of compound **1**.

---

|                                                  |                                                |
|--------------------------------------------------|------------------------------------------------|
| empirical formula                                | C <sub>16</sub> H <sub>18</sub> O <sub>2</sub> |
| formula weight                                   | 242.30                                         |
| crystal system                                   | monoclinic                                     |
| space group                                      | P 212121                                       |
| a [Å]                                            | 8.938(4)                                       |
| b [Å]                                            | 11.742(5)                                      |
| c [Å]                                            | 12.745(6)                                      |
| α [deg]                                          | 90                                             |
| β [deg]                                          | 90                                             |
| γ [deg]                                          | 90                                             |
| volume [Å <sup>3</sup> ]                         | 1337.7(10)                                     |
| Z                                                | 27                                             |
| D <sub>c</sub> [g/cm <sup>-3</sup> ]             | 1.203                                          |
| F (000)                                          | 520                                            |
| T [K]                                            | 299                                            |
| wavelength [Å]                                   | 0.71073                                        |
| absorption coefficient [mm <sup>-1</sup> ]       | 0.078                                          |
| completeness to theta                            | 29.40 (100.0%)                                 |
| reflections collected/unique                     | 12714/3703 [R(int) = 0.0255]                   |
| data/restraints/parameters                       | 3703/0/163                                     |
| R <sub>1</sub> , wR <sub>2</sub> [I>2σ(I)]       | 0.0464, 0.1210                                 |
| R <sub>1</sub> , wR <sub>2</sub> (all data)      | 0.0561, 0.1280                                 |
| goodness of fit on F <sup>2</sup>                | 1.030                                          |
| largest diff. peak and hole [e.Å <sup>-3</sup> ] | 0.254 and -0.209                               |

---

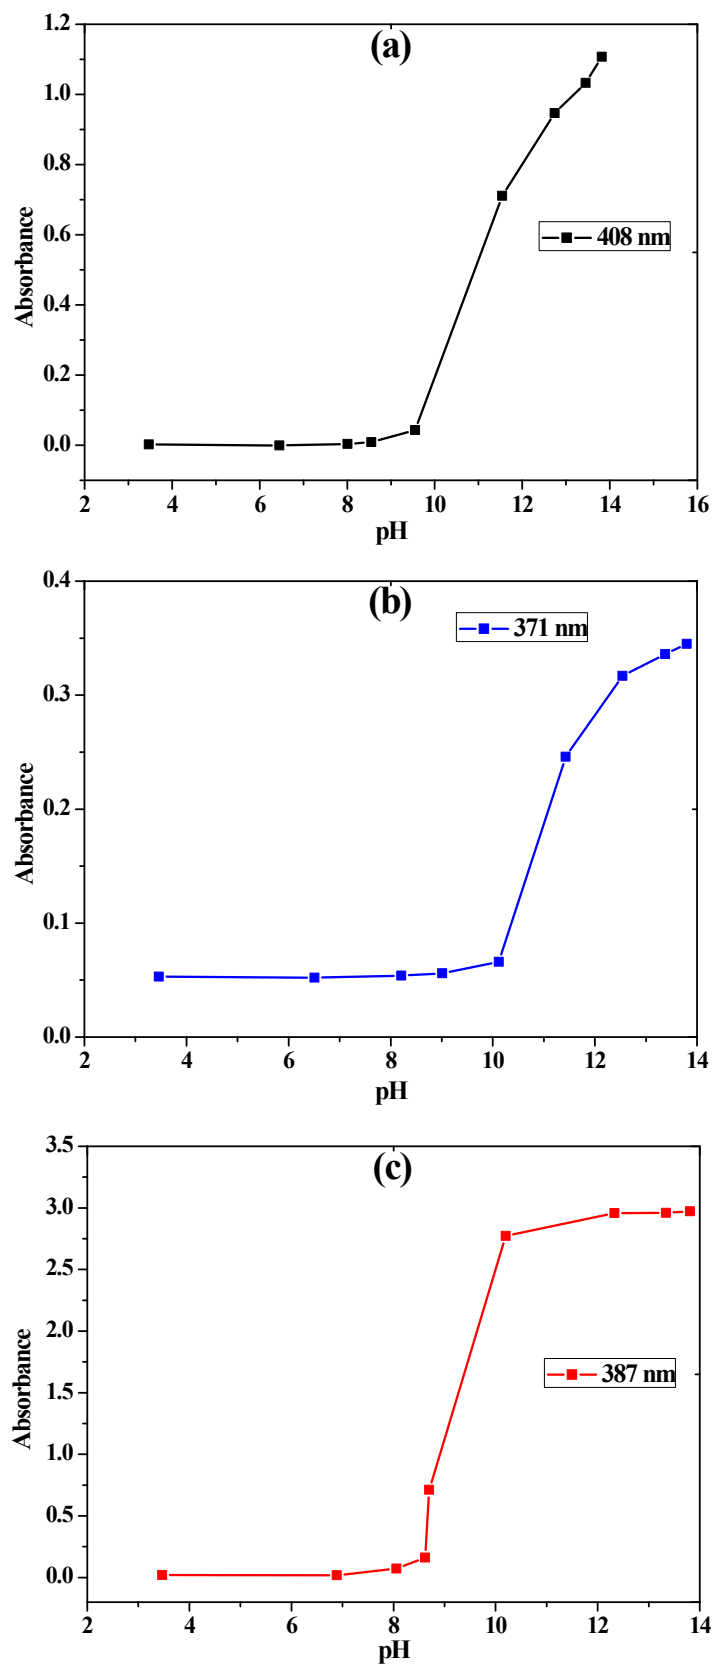

**Fig. S1** The relationship between absorbance and pH of compounds **1** (a), **2** (b) and **3** (c).

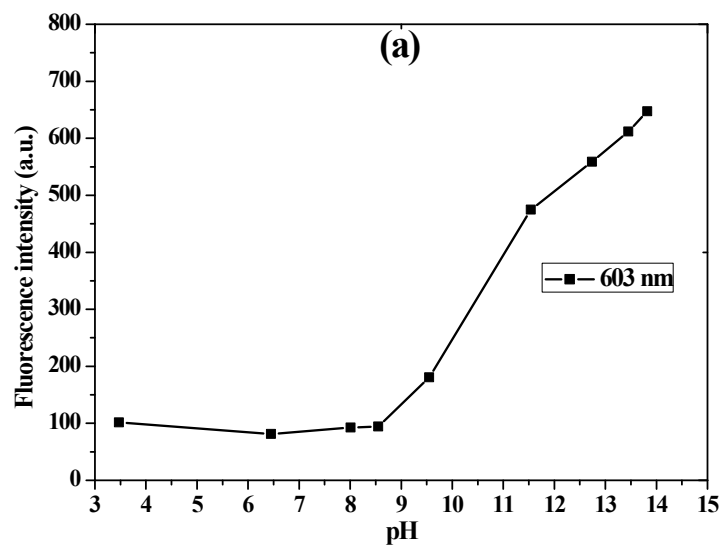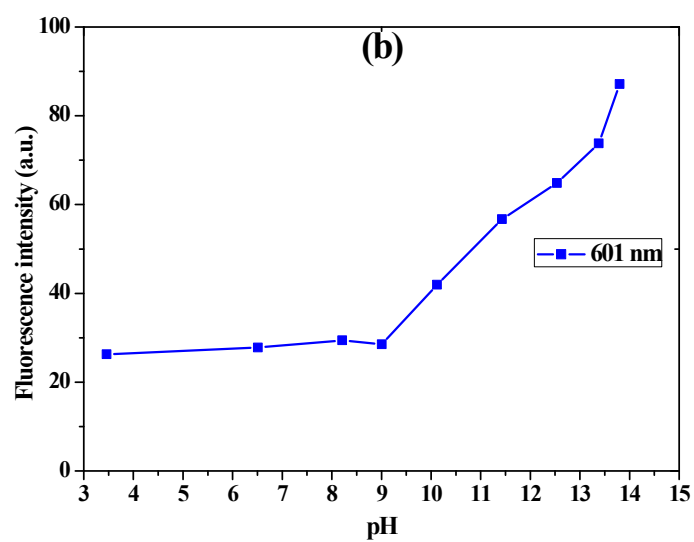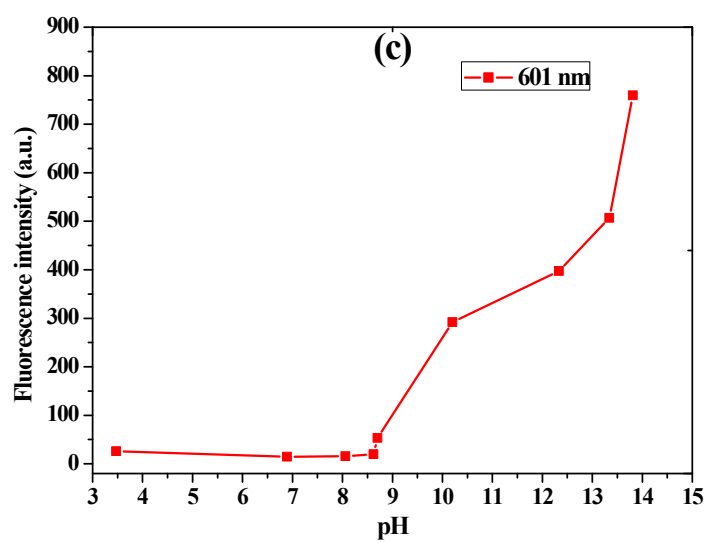

Fig. S2 The relationship between fluorescence intensity and pH of compounds 1 (a), 2 (b) and 3 (c).
